# Supplementary material
Source: PubMed Central journal article supplement (PMC2596066)
Supplement: NIHMS59295-supplement-SI.pdf [file NIHMS59295-supplement-SI.pdf]

## Supporting Information

**Fig 1S.** Mass spectrum of [ $^{15}\text{N}_5$ ]Cro-dG. A, Full scan mass spectrum. B, MS/MS spectrum of parent ion of [ $^{15}\text{N}_5$ ]Cro-dG ( $m/z$  343)

**Table 1S.** Levels of Cro-dGuo in DNA from human liver and lung.

**A**

F: + c ESI Full ms [ 100.00-800.00]

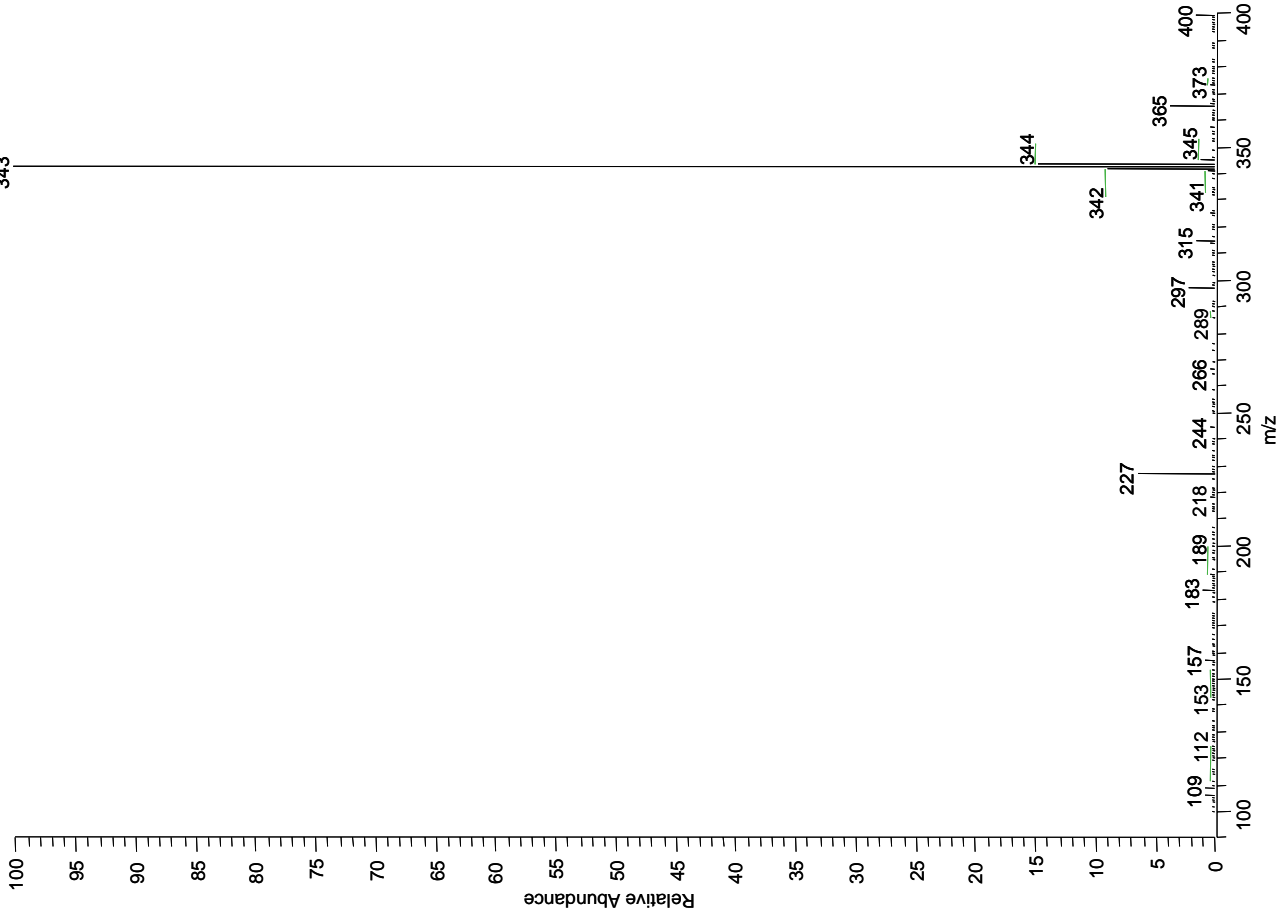**B**

F: + c ESI Full ms2 343.00@30.00 [ 90.00-350.00]

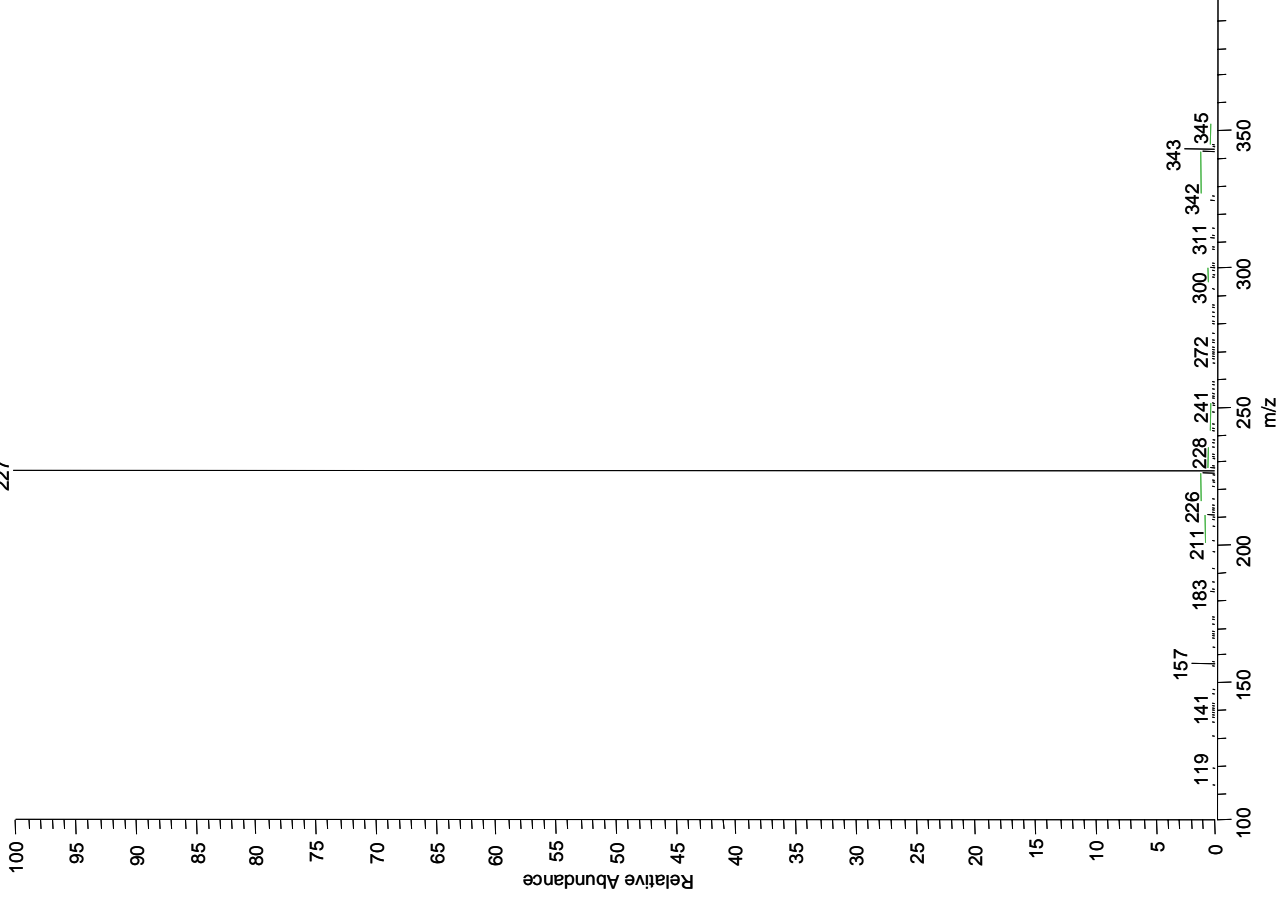

Table 1S.

| Tissue | No. of samples analyzed | No. of samples in which Cro-dGuo were detected | MS area ratio <sup>a</sup> |                 | Cro-dGuo levels <sup>b</sup> |            | Amount of DNA analyzed <sup>c</sup> (mg) |
|--------|-------------------------|------------------------------------------------|----------------------------|-----------------|------------------------------|------------|------------------------------------------|
|        |                         |                                                | (6S, 8S)-2                 | (6R, 8R)-2      | (6S, 8S)-2                   | (6R, 8R)-2 |                                          |
| Liver  | 23                      | 4                                              | 0.08                       | 0.17            | 6.50                         | 14.1       | 0.48                                     |
|        |                         |                                                | 0.03                       | 0.03            | 3.52                         | 3.83       | 0.32                                     |
|        |                         |                                                | 0.09                       | 0.08            | 6.19                         | 5.69       | 0.58                                     |
|        |                         |                                                | 0.23                       | 0.17            | 10.6                         | 7.84       | 0.89                                     |
|        |                         |                                                | Mean ± SD                  | 6.70 ± 2.92     | 7.87 ± 4.47                  |            |                                          |
| Lung   | 45                      | 16                                             | 0.17                       | 0.18            | 10.1                         | 11.0       | 0.73                                     |
|        |                         |                                                | 0.04                       | 0.07            | 3.14                         | 5.69       | 0.56                                     |
|        |                         |                                                | 0.06                       | 0.10            | 5.24                         | 9.41       | 0.46                                     |
|        |                         |                                                | 0.04                       | 0.08            | 17.1                         | 30.4       | 0.11                                     |
|        |                         |                                                | 0.09                       | 0.15            | 10.5                         | 17.8       | 0.34                                     |
|        |                         |                                                | 0.12                       | 0.18            | 7.18                         | 10.6       | 0.69                                     |
|        |                         |                                                | 0.08                       | 0.15            | 7.79                         | 15.3       | 0.39                                     |
|        |                         |                                                | 0.23                       | 0.38            | 5.73                         | 9.57       | 1.61                                     |
|        |                         |                                                | 0.12                       | 0.22            | 3.61                         | 6.51       | 1.37                                     |
|        |                         |                                                | 0.03                       | 0.07            | 7.87                         | 16.9       | 0.18                                     |
|        |                         |                                                | 0.11                       | 0.17            | 13.0                         | 21.3       | 0.32                                     |
|        |                         |                                                | 0.06                       | 0.15            | 9.27                         | 23.0       | 0.26                                     |
|        |                         |                                                | 0.07                       | 0.21            | 4.47                         | 13.3       | 0.64                                     |
|        |                         |                                                | 0.24                       | 0.27            | 6.40                         | 7.79       | 1.45                                     |
|        |                         |                                                | 0.03                       | 0.04            | 1.65                         | 2.93       | 0.60                                     |
|        |                         | 0.05                                           | 0.07                       | 1.99            | 3.30                         | 0.92       |                                          |
|        |                         |                                                | Mean ± SD                  | 7.19 ± 4.14     | 12.8 ± 7.6                   |            |                                          |
| Blood  | 11                      | 0                                              |                            | NA <sup>d</sup> | NA                           |            |                                          |

<sup>a</sup> Cro-dGuo peaks with MS area ratio equal to or over 0.05 are over LOQ. Cro-dGuo peaks with MS area ratio below 0.05 may be lower than LOQ, but still detectable (S/N greater than 3).

<sup>b</sup> Not including those samples in which Cro-dGuo was not detected. Each value was from single measurement.

<sup>c</sup> Determined by amount of dGuo released from enzymatic hydrolysis.

<sup>d</sup> NA, not applicable.
